# Supplementary material for: Optimization of Rare Ginsenosides and Antioxidant Activity Quality of Ginseng Jiaosu Based on Probiotic Strains and Fermentation Technology
Source: Hindawi journal article supplement (doi:10.1155/2023/5686929), 2023-04-17
Supplement: f1 [file 5686929.f1.zip]

Archive with 2 entries (2 files):
- Appendix S1.docx
- Appendix S2-edit.docx
