# Supplementary material for: Optimization of Rare Ginsenosides and Antioxidant Activity Quality of Ginseng Jiaosu Based on Probiotic Strains and Fermentation Technology
Source: Hindawi journal article supplement (doi:10.1155/2023/5686929), 2023-04-17
Supplement: f1 [file 5686929.f1.zip › Appendix S1.docx]

**Appendix S1-1** The standard chromatogram and retention time of ginseng saponin.
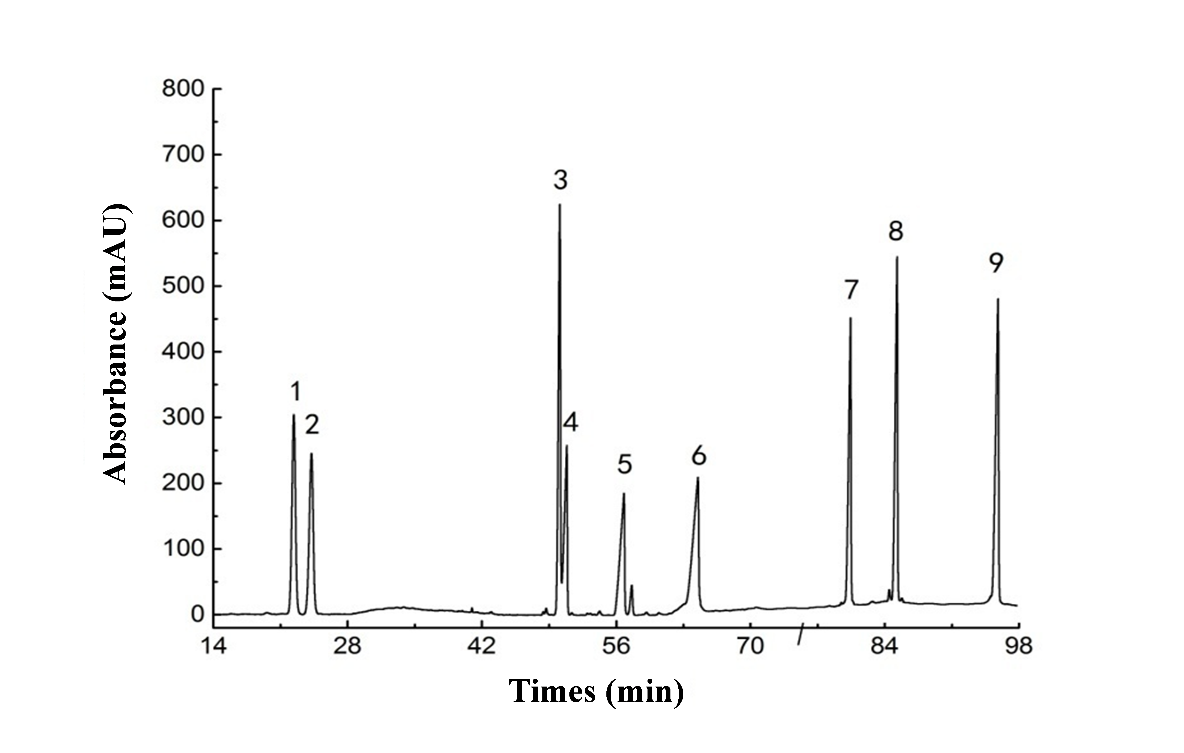


| **NO.** | **Saponin type** | **Standard peak time（min）** |
| --- | --- | --- |
| 1 | Rg1 | 22.32 |
| 2 | Re | 24.096 |
| 3 | Rb1 | 50.035 |
| 4 | Rh1 | 50.787 |
| 5 | Rb2 | 56.712 |
| 6 | Rd | 64.433 |
| 7 | F2 | 80.431 |
| 8 | Rg3 | 85.141 |
| 9 | CK | 95.951 |

**Appendix S1-2** Ginseng saponins' regression equation.

| **Saponin type** | **Standard curve** | **R2** | **Linear range（mg/mL）** |
| --- | --- | --- | --- |
| Rg1 | *y*=84.27*x*-10.14 | 0.9994 | 0.20**~**1.00 |
| Re | *y*=50.96*x*-1.51 | 0.9997 | 0.40**~**2.00 |
| Rb2 | *y*=58.78*x*+6.73 | 0.9997 | 0.20**~**1.00 |
| Rd | *y*=83.21*x*+1.69 | 0.9998 | 0.20**~**1.00 |
| Rh1 | *y*=239.90*x*-57.14 | 0.9996 | 0.02**~**0.10 |
| Rb1 | *y*=156.01*x*-40.19 | 0.9995 | 0.20**~**1.00 |
| F2 | *y*=84.27*x*+1.71 | 0.9993 | 0.20**~**1.00 |
| Rg3 | *y*=146.81*x*+1.90 | 0.9998 | 0.02**~**0.10 |
| CK | *y*=135.10*x*-2.77 | 0.9997 | 0.02**~**0.10 |
