# Supplementary material for: Optimization of Rare Ginsenosides and Antioxidant Activity Quality of Ginseng Jiaosu Based on Probiotic Strains and Fermentation Technology
Source: Hindawi journal article supplement (doi:10.1155/2023/5686929), 2023-04-17
Supplement: f1 [file 5686929.f1.zip › Appendix S2-edit.docx]

**Supporting information**

**1 Methods**

**1.1 Quantification of sugars and organic acids by HPLC**

The concentration of sugars (glucose, and fructose) and organic acids (lactic, acetic, acetic acid, and malic acid et al.) was determined using HPLC 1200 (Agilent Technologies, Santa Clara, CA, USA). An ultraviolet (UV) detector and a refractive index detector (RID) were used for determining the levels of organic acids and sugars, respectively. Organic acids were measured at a UV wavelength of 210 nm, with a C18 column (250 × 4.6 mm, Wondasic, Japan). The column was operated at 40 °C using 0.1% (v/v) phosphoric acid as the mobile phase at a flow of 0.6 mL/min. For sugars, a C-NH2 column (NH2P-50, Shodex, Japan) was equipped with the HPLC system and the mobile phase was acetonitrile and water (70:30). The temperature was kept at 30 °C and a constant flow rate of 1.0 mL/min was maintained. Sample (20 μL) was injected into the chromatograph. Sugars and organic acids were identified and quantified by drawing standard curves and performing regression equation analysis.

Table S1 Retention time and linear relationship of glucose, fructose and lactic acid

| **Standard** | **Retention time (min)** | **Linear relationship** | **R2** |
| --- | --- | --- | --- |
| Glucose | 9.079 | y=1224.2x-1907.5 | 0.9991 |
| Fructose | 9.855 | y=1241.4x-3068.7 | 0.9999 |
| Lactic acid | 12.507 | y=1112.3x-54.278 | 0.9999 |

**1.2 Determination of flavonoids**

Aluminum chloride colorimetric method was used for determining the total flavonoid content (TFC). Sample (0.5 mL) and 0.5 mL distilled water were combined and then 0.3 mL sodium nitrite (5%, m/v) was added. After 6 min, 0.3 mL of aluminum chloride (7.5%, w/v) solution was added and the mixture was incubated for 6 min at ambient temperature. Next, 2.0 mL sodium hydroxide (4%, w/v) was added to stop the reaction. Absorbance was measured at 510 nm using a spectrometer (UV-2000, Unico, China). A standard solution of rutin (ranging from 0 to 100 mg/L) was used to prepare a calibration curve. TFC was defined as the amount of rutin (mg) per L fermented sample. Its linear regression equation is y=10.99x+0.1450, R2=0.999; within the range of rutin concentration 0.01~0.08 mg/mL.

**1.3 Hydroxyl radical scavenging rate**

Take the test tube and add 1.2 mL of 5 mmol/L o-phenanthroline solutions, 0.8 mL of 0.2 mol/L phosphate buffer saline, and mix well by shaking slightly, then add 1.2 mL of 5 mmol/L ferrous sulfate solution, 1.2 mL 15 mmol/L EDTA solution, 1.2 mL of fermentation broth and 1.6 mL of 0.1% H2O2 solution were mixed evenly again, incubated in a water bath at 37 °C for 1 h. The absorbance was measured at 536 nm. Among them, ascorbic acid was selected to replace the sample for the positive control; distilled water was used for the blank control to replace the sample and hydrogen peroxide. Use the following formula to calculate the hydroxyl radical scavenging rate of the fermentation broth：

Hydroxyl radical scavenging rate (%)＝[1-(A sample-A control)/ Ablank]×100 %

**1.4 DPPH radical scavenging rate**

Take 2.0 mL of fermentation broth and add it to 2.0 mL of 0.02 mg/mL DPPH solution, mix well, place in a constant temperature water bath at 25 °C for 30 min, and measure the absorbance at 517 nm. The sample was replaced with absolute ethanol as the blank control group. Use the following formula to calculate the fermentation broth's DPPH free radical scavenging rate.

DPPH radical scavenging rate (%)＝[1-(A sample-A control)/ Ablank]×100 %

**1.5 Superoxide anion radical scavenging rate**

Take 4.8 mL of 0.1 mol/L Tris-hydrochloric acid buffer solution (pH 8.2) in a test tube, incubate in a water bath at 25 °C for 10 min, take it out and immediately add 2.00 mL of fermentation broth, and then add 7 mmol/L of pyrogallol solution 0.6 mL, after mixing, keep warm at 25 °C for 4 min, then add 0.2 mL 10 mol/L HCL solution and mix evenly, measure the absorbance value of the test solution at a wavelength of 325 nm, to avoid adding fermentation broth. Pyrogallol was used as a blank control for zero adjustments. Calculate the superoxide anion radical scavenging rate according to the following formula.

Superoxide anion radical scavenging rate (%)=（A3-A1+A2）/A3×100 %

In the formula: A1 is the absorbance value of the sample to be tested; A2 is the absorbance value of the sample without adding pyrogallol; A3 is the absorbance value of the autoxidation reaction of pyrogallol.
